# Supplementary material for: Endosomal Escape of Antisense Oligonucleotides Internalized by Stabilin Receptors Is Regulated by Rab5C and EEA1 During Endosomal Maturation
Source: PubMed Central journal article supplement — Nucleic Acid Ther. 2018 Apr 1;28(2):86–96. doi: 10.1089/nat.2017.0694 (PMC5899299; doi:10.1089/nat.2017.0694), 2018-04-01
Supplement: Supp_Fig1.pdf [file Supp_Fig1.pdf]

# Supplemental Fig. 1

## Synthesis of bASO (Ionis AA7141)

5'- (Biotin) – (piperidine linker) - Ges mCes Tes Tes mCes Ads Gds Tds mCds Ads Tds Gds Ads mCds Tds Tes mCes mCes Tes Te - 3'

e = 2'-MOE, s = phosphorothioate (PS), d = deoxy, m = 5'-methyl

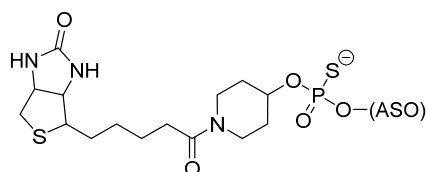

### Experimental Procedure:

An antisense oligonucleotide (ASO) with a 5'-terminal piperidine group was synthesized using standard phosphoramidite chemistry. 5 mg of ASO was dissolved in sodium tetraborate buffer (0.1 M, pH = 8.5, 100  $\mu$ l). Biotin NHS was added (Glen Research, 0.5 mg, 3 equiv) and the reaction was stirred vigorously. Acetonitrile was added to achieve a homogenous solution (50  $\mu$ l). The reaction was heated at 55  $^{\circ}$ C for 60 seconds then stirred at 35  $^{\circ}$ C for 1 hour. The reaction mixture was concentrated under reduced pressure. The residue was dissolved in water and purified by High Performance Liquid Chromatography (HPLC) on a strong anion exchange column (Mono Q, GE Healthcare, 16/10, 20 ml, 10 mm, ionic capacity 0.27–0.37 mmol/ml, A=100 mM ammonium acetate, 30% aqueous acetonitrile, B=1.5 M NaBr in A, gradient of 5–60% B over 80 min, Flow 2.0 ml min<sup>-1</sup>,  $\lambda$ =260 nm). The biotin-conjugated oligonucleotide was desalted using a C18 reverse-phase cartridge (Waters). Oligonucleotides were characterized by ion-pair-HPLC coupled mass spectrometry (MS) analysis with Agilent 1100 MSD system. Yield: 3.4 mg MW (calc) = 7569.11; Found: 7596.40. Purity: 92.3 % (UV), Extinction coefficient: 181.22 mM<sup>-1</sup> x cm<sup>-1</sup> @ 260 nm
