# Supplementary material for: Endosomal Escape of Antisense Oligonucleotides Internalized by Stabilin Receptors Is Regulated by Rab5C and EEA1 During Endosomal Maturation
Source: PubMed Central journal article supplement — Nucleic Acid Ther. 2018 Apr 1;28(2):86–96. doi: 10.1089/nat.2017.0694 (PMC5899299; doi:10.1089/nat.2017.0694), 2018-04-01
Supplement: Supp_Fig2.pdf [file Supp_Fig2.pdf]

## Supplemental Fig. 2

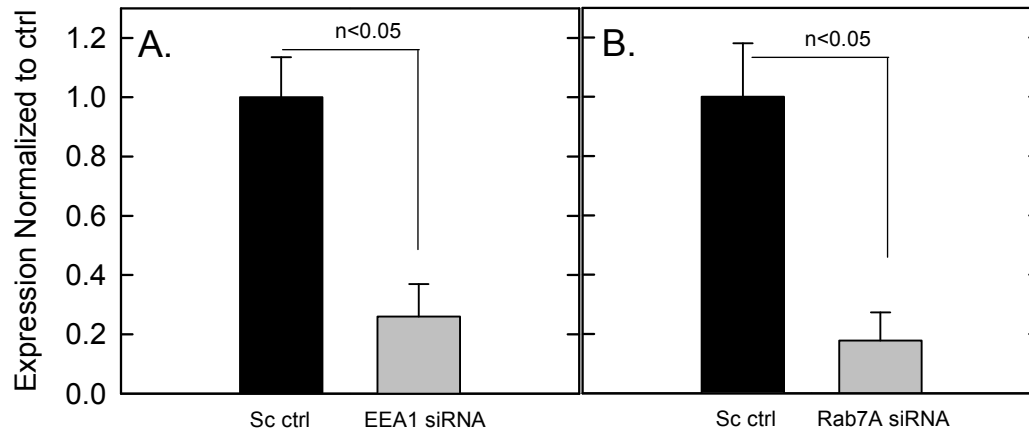

Supplemental Fig 1. Expression of **A)** EEA1 and **B)** Rab7A after treatment with scrambled control and the indicated specific siRNAs by qPCR to verify that siRNA knockdown technology was effective. Statistical analysis was performed by the Student's t test and bars represent normalized *Malat-1* expression mean $\pm$ standard deviation, n=3.
