# Supplementary material for: Endosomal Escape of Antisense Oligonucleotides Internalized by Stabilin Receptors Is Regulated by Rab5C and EEA1 During Endosomal Maturation
Source: PubMed Central journal article supplement — Nucleic Acid Ther. 2018 Apr 1;28(2):86–96. doi: 10.1089/nat.2017.0694 (PMC5899299; doi:10.1089/nat.2017.0694), 2018-04-01
Supplement: Supp_Fig3.pdf [file Supp_Fig3.pdf]

## Supplemental Fig. 3

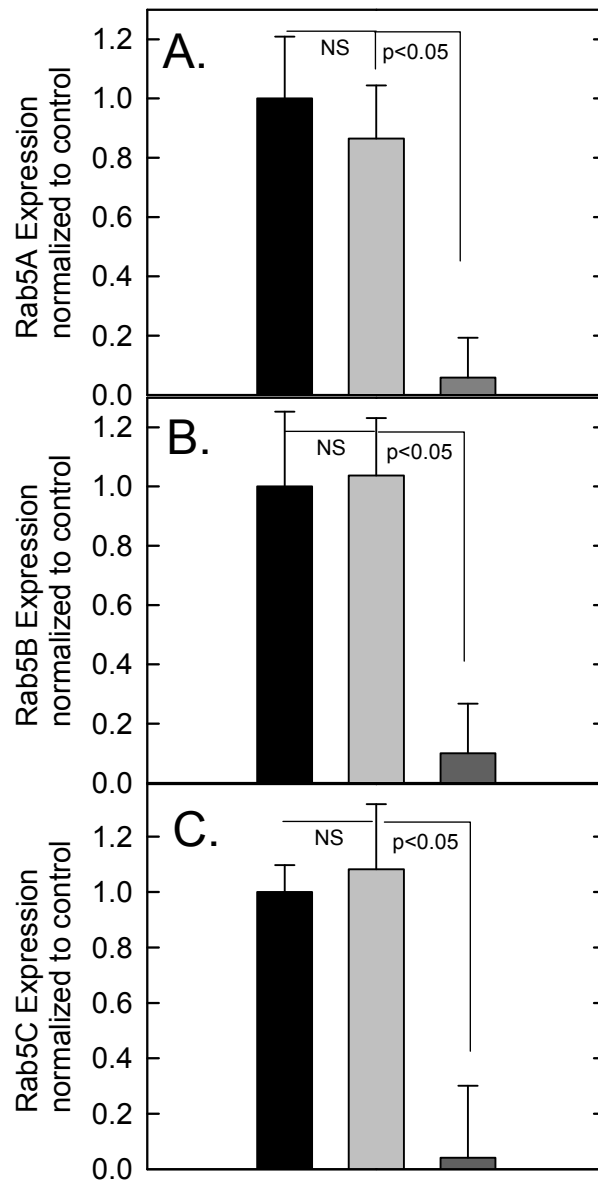

Supplemental Fig 2. Expression of **A**) Rab5A, **B**) Rab5B, and **C**) Rab5C after treatment with scrambled control and the indicated specific siRNAs and analyzed by qPCR to verify that the siRNA knockdown technology was effective. The shaded bars are as follows: Black is untreated, light gray is scrambled siRNA, and dark gray is anti-Rab siRNA. Bars represent normalized *Malat-1* expression mean $\pm$ standard deviation, n=3. Values were calculated using Student's t test.
