# Supplementary material for: Endosomal Escape of Antisense Oligonucleotides Internalized by Stabilin Receptors Is Regulated by Rab5C and EEA1 During Endosomal Maturation
Source: PubMed Central journal article supplement — Nucleic Acid Ther. 2018 Apr 1;28(2):86–96. doi: 10.1089/nat.2017.0694 (PMC5899299; doi:10.1089/nat.2017.0694), 2018-04-01
Supplement: Supp_Fig4.pdf [file Supp_Fig4.pdf]

## Supplemental Fig. 4

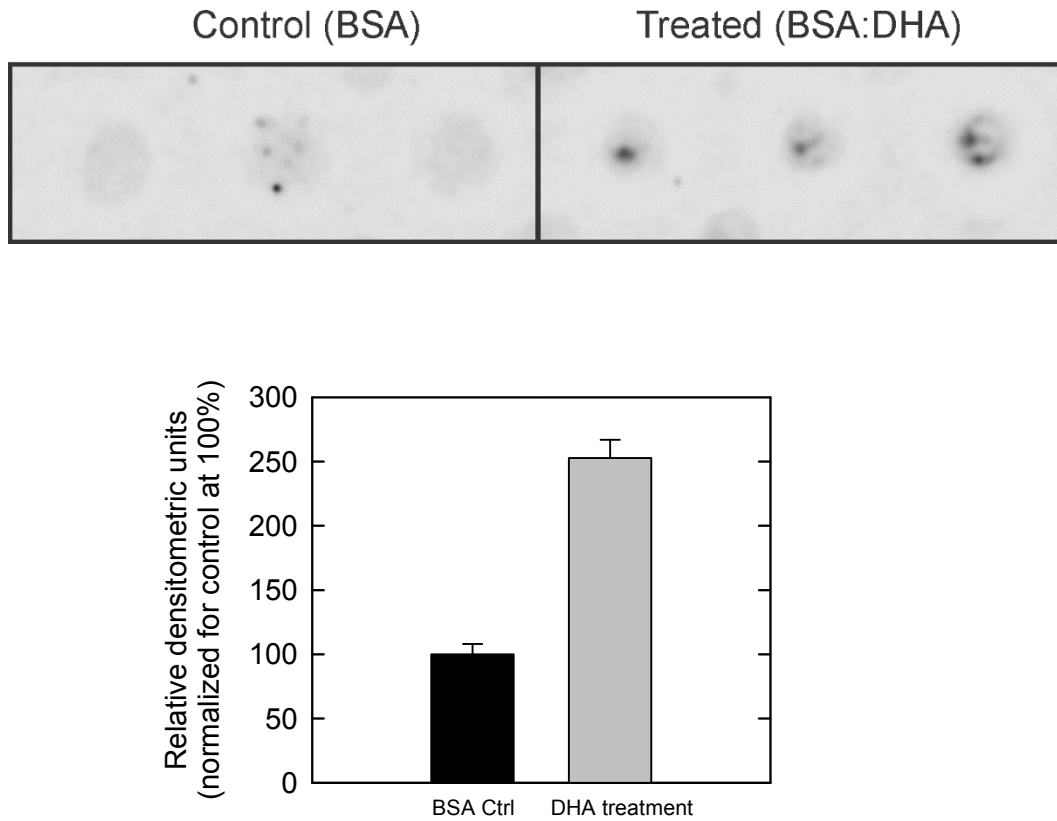

Supplemental Fig. 3: 190-HARE cells were plated in a 24 well dish and grown to confluence. Media was replaced by either a BSA control (1% BSA in DMEM), or a 10mM BSA-conjugated DHA solution. Cells were incubated in media for 6 hours before being harvested. Using a Minifold® dot blot apparatus, 30 µg of lysate protein equivalence were blotted onto nitrocellulose equilibrated in PBS. Nitrocellulose and samples were vacuum dried via Minifold apparatus, and blocked in *Li-Cor Odyssey*® blocking buffer for one hour. The blot was incubated with a LBPA mouse monoclonal antibody purchased from Millipore-Sigma (MABT837), overnight at 4°C, followed by incubation with an anti-mouse fluorescent secondary antibody from *Li-Cor* and imaged using a *Li-Cor Odyssey Fc* imaging system. Densitometry was done on the blots using Fiji imaging software, with a normalization of samples taken from BCA analysis of sample concentrations. Statistics determined from a two tailed students t-test ( $p < 0.05$ ).
