# Supplementary material for: Endosomal Escape of Antisense Oligonucleotides Internalized by Stabilin Receptors Is Regulated by Rab5C and EEA1 During Endosomal Maturation
Source: PubMed Central journal article supplement — Nucleic Acid Ther. 2018 Apr 1;28(2):86–96. doi: 10.1089/nat.2017.0694 (PMC5899299; doi:10.1089/nat.2017.0694), 2018-04-01
Supplement: Supp_Fig5.pdf [file Supp_Fig5.pdf]

## Supplemental Fig. 5

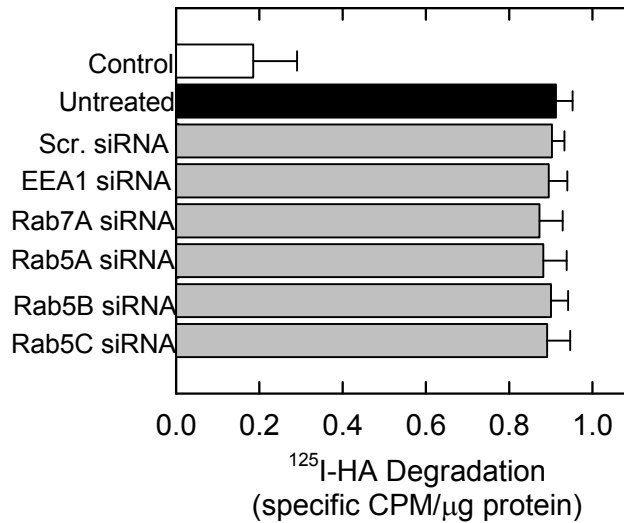

Supplemental Fig. 4: Degradation of  $^{125}\text{I}$ -HA was measured by a cetylpyridinium chloride precipitation assay as described by McGary *et al* (1). Briefly, Cells were allowed to internalize  $^{125}\text{I}$ -HA for 24 hrs and 50- $\mu\text{l}$  samples of conditioned medium were mixed with 250  $\mu\text{l}$  of 1 mg/ml HA in 1.5-ml microcentrifuge tubes. After mixing at room temperature, 300  $\mu\text{l}$  of 6% (w/v) cetylpyridinium chloride in distilled water was added, and the tubes were mixed by vortexing. After 10 min, the samples were centrifuged at 22  $^{\circ}\text{C}$  for 5 min at 7800 x  $g$  in an Eppendorf model 5417 microcentrifuge. A sample (300  $\mu\text{l}$ ) of the supernatant was taken for determination of radioactivity, and the remainder was removed by aspiration. The tip of the tube containing the precipitated pellet was cut off then put in a gamma counter tube, and radioactivity was determined. Degradation was measured as the time-dependent increase of nonprecipitable radioactivity. At least 80% of the total radioactivity was precipitable at the beginning of each experiment. Statistics were calculated from a student's t-test with a  $p$  value of 0.05.
